# Supplementary material
Source: PubMed Central journal article supplement (PMC3655467)
Supplement: emboj201378s1.pdf [file emboj201378s1.pdf]

**The histone demethylase Jmjd3 sequentially associates with the transcription factors Tbx3 and Eomes to drive endoderm differentiation**

Apriliana E. R. Kartikasari, Josie X. Zhou, Murtaza S. Kanji, David N. Chan, Arjun Sinha, Anne Grapin-Botton, Mark A. Magnuson, William E. Lowry and Anil Bhushan

**SUPPLEMENTARY INFORMATION**

**Inventory of Supplementary Information:**

**Supplementary Figures 1-8**

**Supplementary Materials and Methods**

**Supplementary Tables 1-3**

**Supplementary References**

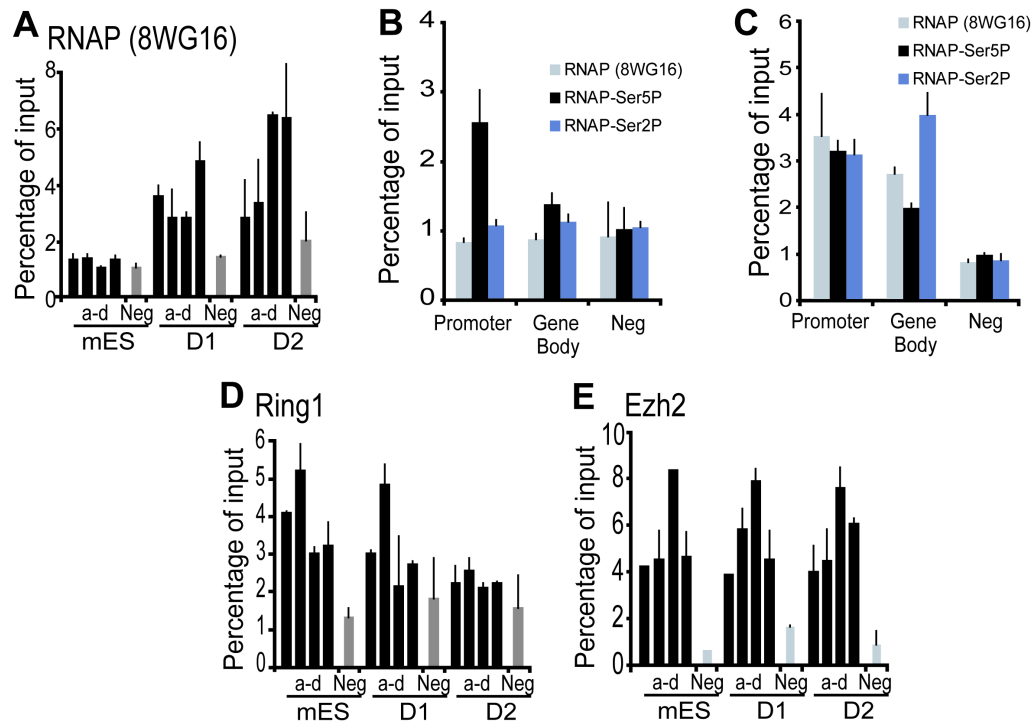

**Supplementary Figure 1. Release of paused RNAP is accompanied by eviction of PRC1.**

(A) RNAP (8WG16) enrichment on the *Eomes* promoter is only detected in D1-D2 differentiation.

(B) In D0, a paused conformation of RNAP was detected in the *Eomes* locus. The binding of RNAP (8WG16), RNAP-Ser5P and RNAP-Ser2P in the *Eomes* promoter and the gene body region was analyzed using the ChIP analyses. Only RNAP-Ser5P was detected primarily in the promoter region, indicating the presence of the paused RNAP in this region.

(C) In D2, the elongation form of RNAP (RNAP-Ser2P) was highly abundant both in the promoter and the gene body of *Eomes*, analyzed by ChIP.

(D-E) The release of paused RNAP is accompanied by eviction of Ring1, the core component of PRC1, but not Ezh2, the core component of PRC2, during D1-D2 differentiation, shown by ChIP analyses.

All values are mean $\pm$ SEM (n=2-3).

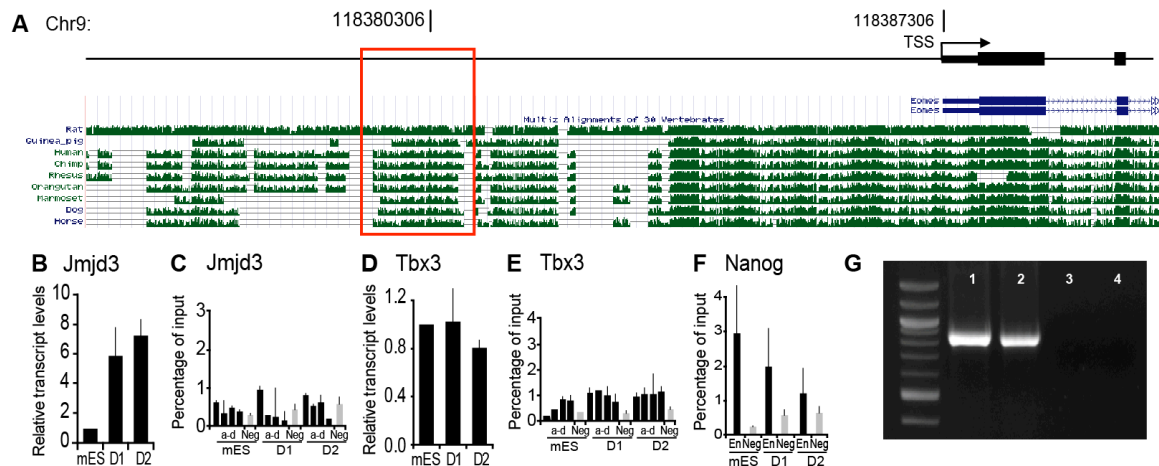

**Supplementary Figure 2. *Eomes* enhancer in mammals and recruitment of Tbx3-Jmjd3 complex during early differentiation.**

(A) *Eomes* enhancer region (red box) is highly conserved in mammals as shown by sequence alignment of the *Eomes* locus proximal region by the UCSC genome browser.

(B) *Jmjd3* expression is upregulated in D1-D2-differentiated cells.

(C) *Jmjd3* is not recruited to the *Eomes* promoter proximal region during early differentiation. *Jmjd3* recruitment to *Eomes* promoter (a-d) and negative region (Neg) were analyzed in ES cells and D1-D2-differentiated cells.

(D) *Tbx3* expression is sustained in D1-D2-differentiated cells.

(E) *Tbx3* is minimally recruited to the *Eomes* promoter proximal region during early differentiation.

(F) *Nanog* binding to *Eomes* enhancer declines as ES cells are differentiated.

(G) *Eomes* enhancer region of 850bp was amplified to test the presence of genomic DNA in the cell lysate following DNase1 treatment. Template DNA was isolated from cell lysate without (lane2) or with (lane3) nuclease treatment using DNase1. Lane1 was PCR from genomic DNA control. Lane4 was water control.

Values are mean±SEM (n=2-3).

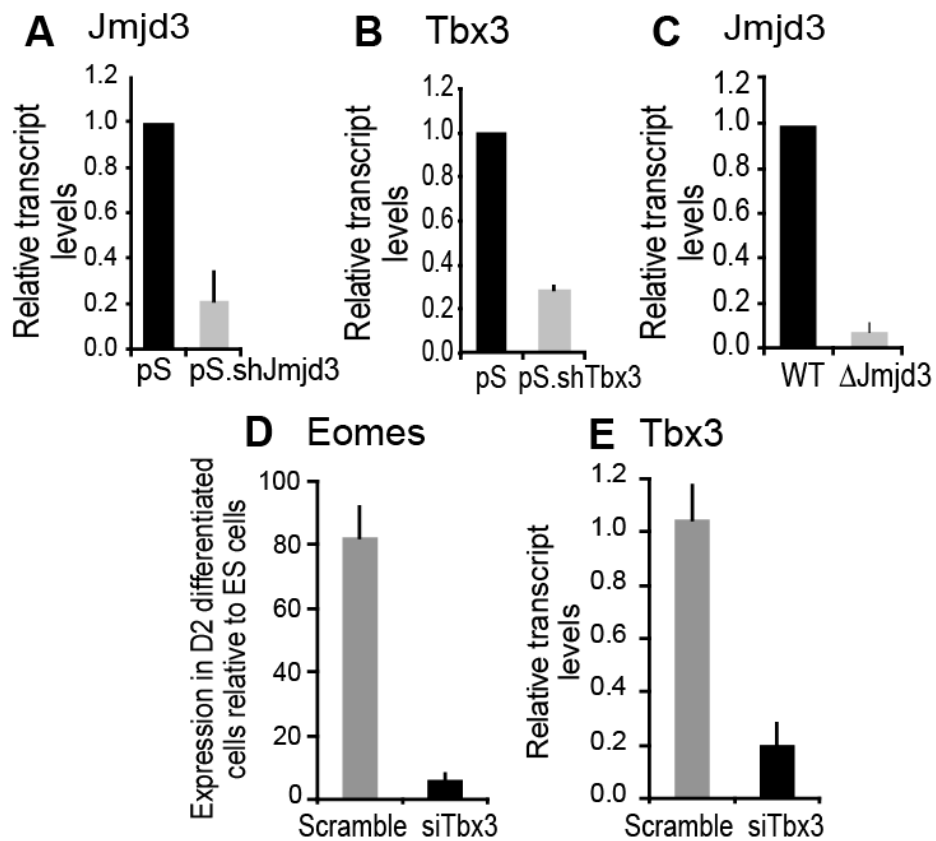

**Supplementary Figure 3. The T-box protein, Tbx3, is required for *Eomes* activation**

Mean $\pm$ SEM (n=2-3) of *Jmjd3* and *Tbx3* in D2-differentiated *Jmjd3*-knockdown (pS.shJmjd3) (A), *Tbx3*-knockdown (pS.shTbx3) (B) and *Jmjd3*-null ( $\Delta$ *Jmjd3*) (C) cells are reduced compared to their respective controls.

Mean $\pm$ SEM (n=2-3) of *Eomes* (D) and *Tbx3* (E) expression is lower in D2-differentiated cells transfected with si*Tbx3* SMARTpool compared to the si*Scramble* control as determined by qPCR.

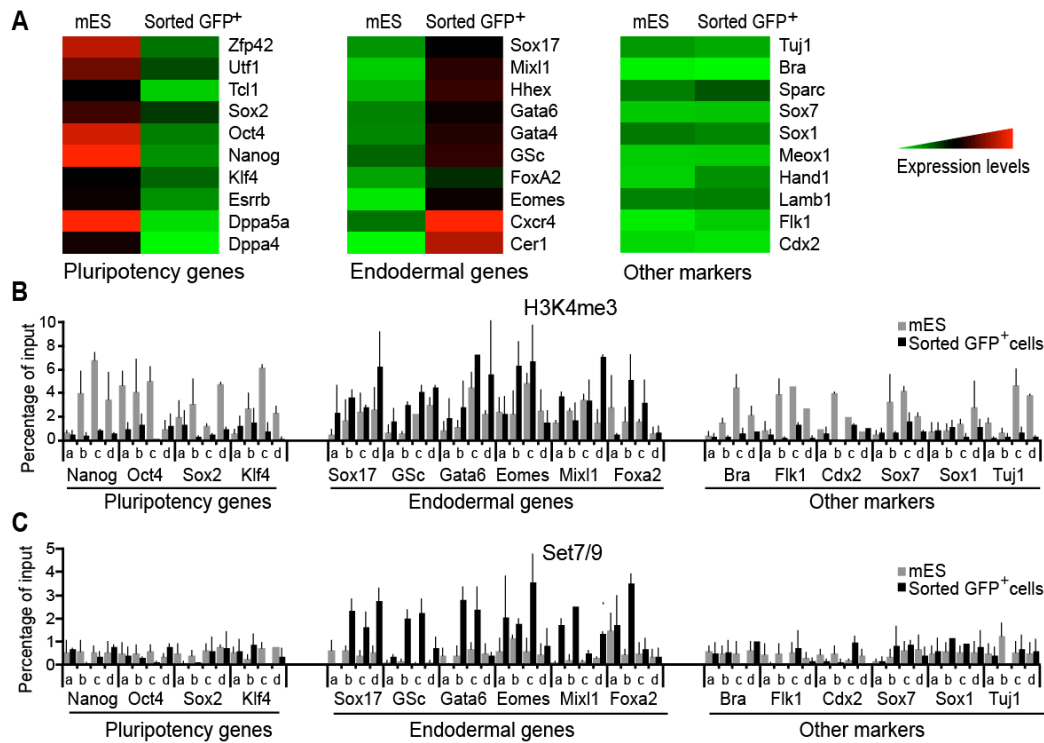

**Supplementary Figure 4. The core definitive endoderm genes are selectively expressed in Sox17.GFP<sup>+</sup> cells.**

(A) Microarray expression analyses of ES and the sorted Sox17.GFP<sup>+</sup> cells. The levels of gene expression are shown as green (low expression) to red (high expression).

(B) Promoters of definitive endoderm genes are marked by H3K4me3. ChIP analyses of H3K4me3 were performed using chromatin from ES and the sorted Sox17.GFP<sup>+</sup> cells. Four pairs of primers at the TSS-promoter region (a,b,c,d) were used for each promoter.

(C) Set7/9 selectively occupies the promoters of endodermal genes in the sorted Sox17.GFP<sup>+</sup> cells.

All values are mean±SEM (n=2-3).

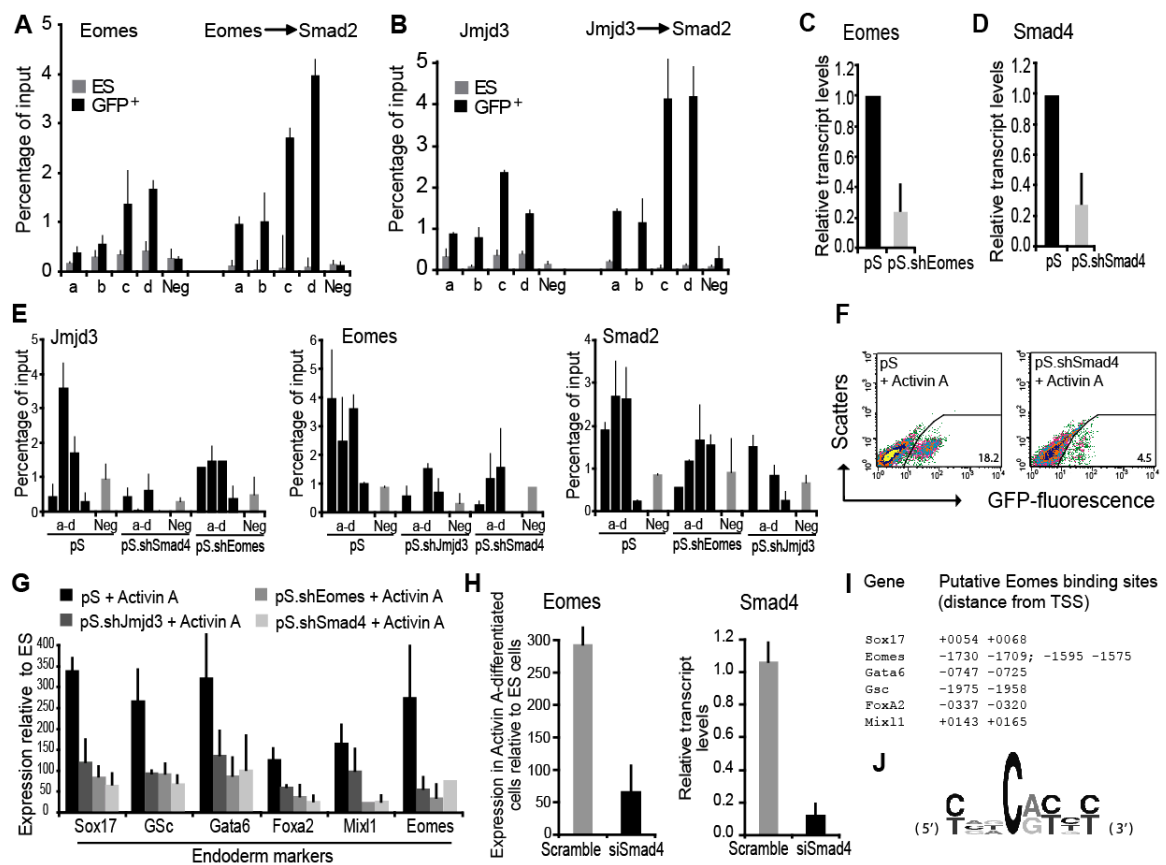

**Supplementary Figure 5. Eomes directs Jmjd3 and Smad2 to the promoters of core definitive endoderm regulators.**

(A, B) Jmjd3, Eomes and Smad2 cooccupy the *Eomes* promoter. Cooccupancy of Jmjd3, Eomes and Smad2 in the *Eomes* promoter region (a, b, c, d) and the negative control region (Neg) was analyzed using the sequential ChIPs. Eomes (A, left panel) and Jmjd3 (B, left panel) enrichment, as well as the sequential Smad2 enrichment (A and B, right panels) at the *Eomes* promoter were observed in sorted GFP+ cells but not in undifferentiated mES cells.

(C, D) *Eomes* and *Smad4* are efficiently knocked-down using shRNAs. Expression of *Eomes* (C) and *Smad4* (D) in D2-differentiated knockdown cells were determined by qPCR.

(E) *Jmjd3*, *Eomes* and *Smad2* occupancy on the *Eomes* promoter are dependent on each other. ChIP analyses were performed using Activin A-differentiated cells on the promoter (a-d) and the negative region (Neg).

(F) Flow cytometry analyses show lower number of Sox17.GFP<sup>+</sup> cells in *Smad4* knockdown (pS.sh*Smad4*) cells (right panel) compared to the control (pS) cells differentiated with Activin A (left panel). (G) Mean of definitive endoderm gene expression $\pm$ SEM in the Activin A-differentiated knockdowns are reduced in the knockdowns compared to the controls. (H) Expression of *Eomes* was also reduced in the Activin A-differentiated cells transfected with si*Smad4* SMARTpool compared to the si*Scramble* control.

(I, J) Putative T-box binding sites are present in the promoter regions of definitive endoderm genes. (I) The position of putative T-box binding sites on the endodermal promoters relative to the transcription start site (TSS). (J) The core motif of *Eomes* binding site formulated using our exhaustive motif search algorithm.

All values are mean $\pm$ SEM (n=2-3).

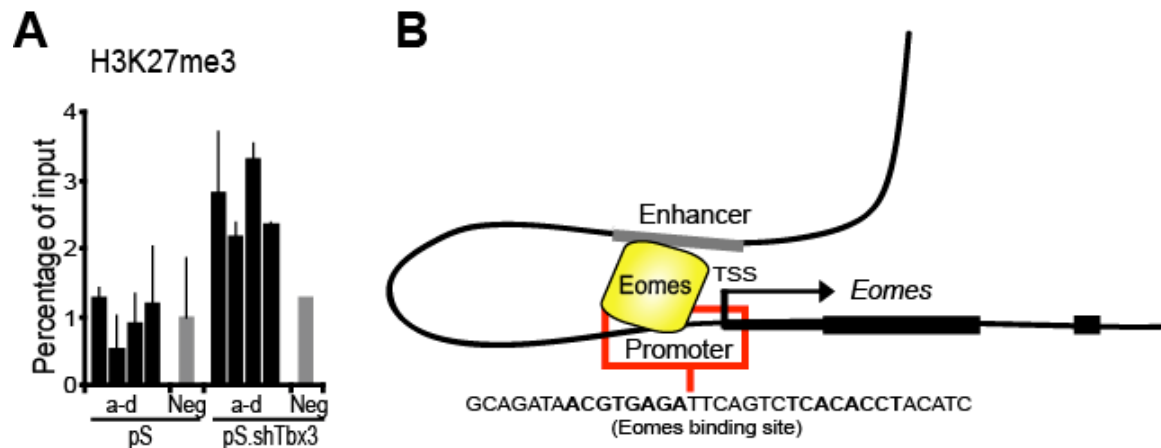

**Supplementary Figure 6. Tbx3 is required for *Eomes* gene activation and chromosomal interaction between enhancer and promoter of the *Eomes* locus.**

(A) H3K27me3 is enriched at the *Eomes* promoter (a-d) and not at the negative region (Neg) in Activin A-differentiated *Tbx3*-knockdown cells but not the control cells as determined by ChIP analyses. Values are mean $\pm$ SEM (n=2).

(B) Model of DNA looping in the *Eomes* locus with a putative Eomes binding site on the promoter region of the *Eomes* locus identified using our exhaustive search algorithm.



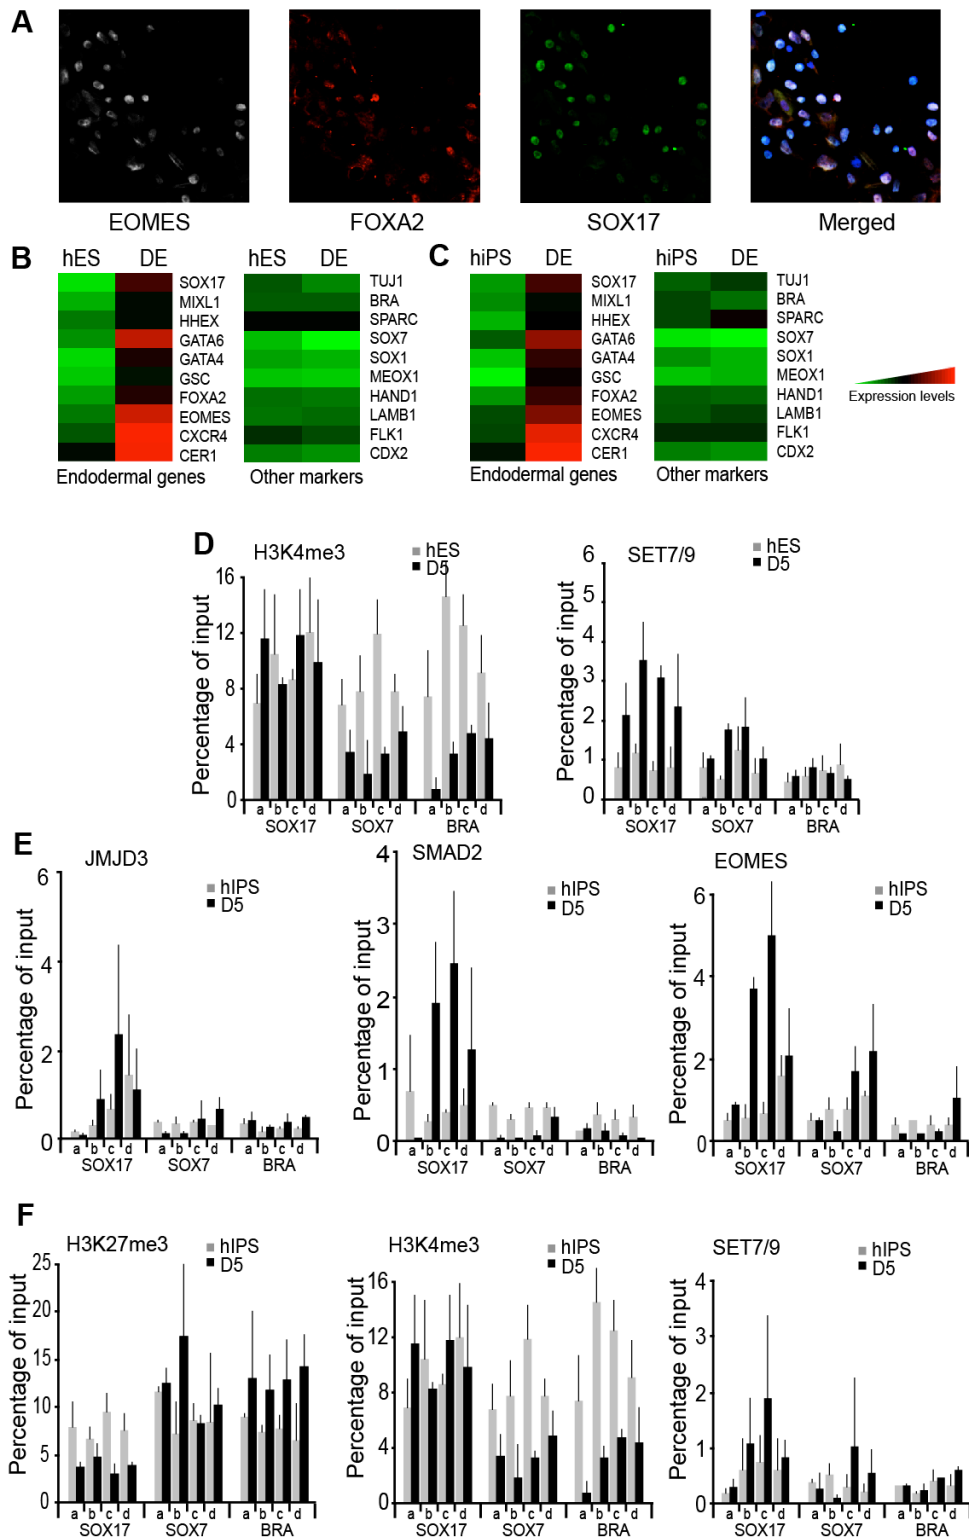

**Supplementary Figure 7. The sequential two-step activation of *EOMES* locus is conserved in hiPS derived from fibroblast.**

(A) Colocalization of EOMES, FOXA2 and SOX17 in the Activin A-differentiated hES.

(B, C) Microarray expression analyses of hES, hiPS and their respective Activin A-induced definitive endoderm. The levels of gene expression are shown as green (low expression) to red (high expression).

(D) H3K4me3 and SET7/9 are enriched on the promoter of *SOX17* but not *SOX7* and *BRA* in hES-derived definitive endoderm.

(E) JMJD3, SMAD2, EOMES and (F) H3K27me3, H3K4me3 and SET7/9 are enriched on the promoter of *SOX17* but not *SOX7* and *BRA* in hiPS-derived Activin A-induced definitive endoderm. Four pairs of primers at the TSS-promoter region (a,b,c,d) were used to perform ChIP analyses for each promoter.

Values are mean±SEM (n=2-4).

## **SUPPLEMENTARY MATERIALS AND METHODS**

### **Flow cytometry and cell sorting**

Prior to flow cytometry and cell sorting, single cell suspension was prepared by dissociation using Trypsin (Invitrogen) and gentle pipetting. Cells were then resuspended at approximately  $1 \times 10^5$  cells/mL in PBS supplemented with 3% FBS. Live cells, 20,000 events per analysis, were analyzed for GFP or mCherry fluorescence using four-laser digital LSRII analyzer (BD Bioscience) or sorted for GFP<sup>+</sup> using FACSAriaII benchtop cell sorter (BD Bioscience).

### **Coimmunostaining**

Coverslips were fixed in 4% PFA, blocked for 1 h in 10% serum + 0.1% Tween 20 (or 0.1% Triton-X-100), then incubated overnight at 4 °C with primary antibodies. Following primary antibody incubation, the coverslips were incubated with Alexa Fluor secondary antibodies (Invitrogen) at room temperature for 1 h and mounted in Prolong Gold (Invitrogen). All imaging was performed on Zeiss Axio Imager A1.

### **RNA extraction, reverse-transcription and real-time quantitative PCR**

Total RNAs were extracted using Absolute RNA Microprep Kit (Agilent Technology) or RNeasy Plus Mini Kit (Qiagen) and digested with RNase-free DNase (Fermentas) to eliminate DNA. The quality and quantity of the extracted RNA were assessed using Nanodrop (Spectrophotometers) and Bioanalyzer (Agilent Technologies). 0.5 µg of total RNA from each sample was denatured at 65<sup>0</sup>C and then reverse transcribed using SuperscriptIII reverse transcriptase (Invitrogen) at 50<sup>0</sup>C for 1 hour. Real-time quantitative PCR (qPCR) was performed using ABI7900HT (Applied Biosystems) with initial denaturation at 95<sup>0</sup>C for 20 seconds, followed by 50 cycles of 94<sup>0</sup>C for 1 second and 60<sup>0</sup>C for 20 seconds, then continued with a dissociation stage. Each qPCR reaction contained 1x FastSybrGreen Mix (Applied Biosystems), 500 nM of each primer and 100 ng cDNA. Relative expression of a certain target gene was determined using the comparative cycle threshold (Ct) method, where the amount of target cDNA was normalized to the internal control, cyclophilin cDNA, and expressed as relative to the baseline normal control cDNA ( $2^{-\Delta\Delta C_t}$ ). Data are representative of two to three independent experiments, and error bars indicate standard error of the replicates. Data are

statistically analyzed using Student's t-test followed by Bonferroni correction for multiple comparisons. Primer sequences are included in Supplementary Table 2.

### **Microarray profiling**

Two to three biological replicates for undifferentiated and Activin A-differentiated stem cells were hybridized to GeneChip Human Gene 1.0ST Array or GeneChip Mouse Gene 1.0ST Array (Affymetrix) depending on the cell source. Hybridization was done at UCLA Microarray Core Facility. Raw data obtained by Affymetrix scanner passed data quality control steps prior to RMA normalization using the Affymetrix Suite Analysis software. The normalized data were analyzed for differential gene expression with statistical analysis using Z-test FDR-adjusted *P*-values. Heatmaps of the fold-changes were generated using Mayday microarray data analysis as described in (Battke et al., 2010).

### **Eomes binding motif analysis**

Mathematica7.0 was used to build an exhaustive motif search algorithm to map the Eomes binding motif on mouse promoters between (-2500 to +500) based on our ChIP-Eomes binding profile and the previously established Eomes binding specificity (Conlon et al., 2001). The extracted consensus sequences were graphically represented using Weblogo (UC Berkeley). Mouse *Sox17* promoter (-683 to +82) was cloned into pmCherry-1 vector (Clontech) containing the identified Eomes binding motif (+54 to +68). A mutated version of the Eomes element was also cloned into pmCherry-1 vector. The resulting constructs were transfected to Hek293T using Lipofectamine 2000, followed by 100 ng/mL Activin A treatment for 3 days in serum free DMEM as indicated. Promoter activity reflected by mCherry fluorescence was analyzed using flow cytometry. Protein binding to the promoter constructs was characterized by ChIP, using a pair of primers (see Supplementary Table 2) to amplify a region between the 3' end of the promoter and the mCherry coding sequence.

### **Chromatin conformation capture**

Chromatin conformation capture (3C) was performed according to (Gavrilov et al., 2009) with minor modifications. Briefly, single cell suspension of  $1 \times 10^6$  cells was cross-linked with 1% formaldehyde for 15 minutes at room temperature. The reaction was quenched with 125 mM glycine. The cells were washed once with ice cold PBS and then lysed with

5 mL of ice cold lysis buffer containing 10 mM Tris-HCl pH 8.0, 10 mM NaCl, 0.2% NP-40 and 1x complete proteinase inhibitors. Following 20 minutes incubation on ice, nuclei were pelleted and resuspended in 0.5 mL 1.2x MspI restriction buffer (Fermentas). SDS was added to 0.3% final concentration and nuclei were incubated for 1 hour at 37<sup>0</sup>C with vigorous shaking. Then, TritonX-100 was added at a final concentration of 1.8% and nuclei were incubated for 1 hour at 37<sup>0</sup>C with shaking. The sample was incubated with 1000 Units of MspI, overnight at 37<sup>0</sup>C with shaking. Similar digestion efficiency was obtained from each sample preparation, assessed by qPCR analysis with primers, 3C-1 and 3C-2, spanning the MspI site. MspI was then inactivated with addition of SDS (1.3% final concentration) and shaking for 20 minutes at 65<sup>0</sup>C. Nuclei were incubated with 7 mL of 1x ligation buffer and 1% final concentration of TritonX-100, for 1 hour at 37<sup>0</sup>C. Samples were then incubated with 100 Units of T4 DNA ligase (Fermentas) at 16<sup>0</sup>C overnight with slow agitation. Protein digestion and reverse cross-linking was performed overnight at 65<sup>0</sup>C in the presence of Proteinase K with agitation. RNA was degraded with RNase for 30 minutes at 37<sup>0</sup>C. DNA was then phenol/chloroform extracted and ethanol-precipitated. BAC clone RPCI.23C-448K1 (Invitrogen) containing mouse *Eomes* locus and BAC clone RP11-1107O23 (Invitrogen) containing human *EOMES* locus were used as positive control. Ten µg of the BAC clone were digested with 500 Units of MspI overnight at 37<sup>0</sup>C with agitation. The digested DNA was phenol chloroform extracted and ethanol precipitated. These DNA fragments were ligated with 50 Units of T4 DNA ligase at 16<sup>0</sup>C overnight with slow agitation. The ligated BAC DNA was then extracted with phenol/chloroform and precipitated with ethanol. Taqman probes flanking the *Eomes/EOMES* enhancer region and primers were designed using Primer Express 3.0 (Applied Biosystems). All primers were designed to anneal at and face the same ends of the MspI sites, have melting temperatures of 58-60<sup>0</sup>C and yield amplicons of 100-150 bp. Each PCR efficiency was determined based on the calibration curve generated using qPCR of series of successive dilutions of the BAC preparation. Primer pairs with similar PCR efficiencies were chosen to analyze 3C. qPCR was performed using ABI7900HT with initial denaturation at 95<sup>0</sup>C for 3 minutes, followed by 50 cycles of 94<sup>0</sup>C for 5 seconds and 60<sup>0</sup>C for 20 seconds. The quality and quantity of each 3C samples were analyzed using Nanodrop (Spectrophotometers). qPCR was done in triplicate for each primer pairs and 20 ng of 3C DNA was used for each qPCR reaction. The interaction frequencies were calculated based on the amount of PCR products obtained with the 3C primer pairs, followed by normalization with the log ratio of the interaction frequencies

between fragments in the control region, to correct for the crosslinking and ligation efficiencies and the amount of the templates. The control region was the anchor probe primer (3C-1) with the primer of the adjacent restriction fragment (3C-2). Data are representative of two independent experiments, and error bars indicate standard error of the replicates. Data are statistically analyzed using the Student t-test, followed by Bonferroni correction for multiple comparisons. Genomic coordinates are based on build mm9 for mice and hg19 for human. Probe and primer sequences are included in Supplementary Table 2.

### Supplementary Table 1. shRNA sequences used in this study

| Targeted gene                      | shRNA sequence (5' to 3')                                |
|------------------------------------|----------------------------------------------------------|
| Jmjd3                              | <b>CCTCTGTTCTTGAGGGACAATTCAAGAGATTGTCCCTCAAGAACAGAGG</b> |
| Eomes                              | <b>ACTCACCAATAACAAAGGTGTTCAAGAGACACCTTTGTTATTGGTGAGT</b> |
| Smad4<br>(Deckers et al.,<br>2006) | <b>CCAGCTACTTACCATCATATTCAAGAGATATGATGGTAAGTAGCTGG</b>   |
| Tbx3 (Han et<br>al., 2010)         | <b>GAATTGTACATAGCTGGATTTCAAGAGAATCCAGCTATGTACAATTC</b>   |

### Supplementary Table 2. Probe and primers used in this study

| Species | Name               | Approximate<br>distance from<br>TSS | Sequence (5' to 3')                          | Amplicon<br>size (bp) |
|---------|--------------------|-------------------------------------|----------------------------------------------|-----------------------|
| Mouse   | Eomes<br>-Enhancer | -7000                               | GCATTGCCTTCCGTCTACTCA<br>TTAAGGCCCCATTTCTGAA | 106                   |
| Mouse   | Eomes-A            | -1500 to -1000                      | CTGATCGCGCAGGATGTCA<br>GTAGTGGGTCTTGGGCGCT   | 101                   |
| Mouse   | Eomes-B            | -1000 to -500                       | CGGAATCCTTTTGCCATCTC<br>GGAACCGCTTTTTGTCTGTC | 101                   |

|       |            |                |                                                  |     |
|-------|------------|----------------|--------------------------------------------------|-----|
| Mouse | Eomes-C    | -500 to 0      | GCCGCACATATATAAGCAGCC<br>AGCAACCAGCCATTTCTCTCTC  | 101 |
| Mouse | Eomes-D    | 0 to +500      | GCGCCCACGTCTACCTGTG<br>TCCACCCTGCACTCACCTG       | 101 |
| Mouse | Negative   | Chr13          | GCCACAGTTAGCCATCTGCA<br>GCCCTGACCTCTGGACCCTA     | 101 |
| Mouse | Eomes-body | +7000 to +7500 | TTCGGGAAGAGAAGGGTTGG<br>TTTCCCCGCTTGACTCTCAG     | 101 |
| Mouse | Sox17-A    | -1500 to -1000 | TGTGAGCAAGGCTTCATTCTT<br>ACCGGTCGGGAATGTTTCTT    | 142 |
| Mouse | Sox17-B    | -1000 to -500  | AGGGTCTGGCCTGAATGTTCT<br>GGAGGTGGAGATGGAAATTCG   | 101 |
| Mouse | Sox17-C    | -500 to 0      | CTTGGCCATCAGAACACCAA<br>GTGATCAACTGGGACTCCGAA    | 114 |
| Mouse | Sox17-D    | 0 to +500      | TCTGAGAGGCAGGAGAGCTACA<br>ATCGATTCTCTAGCCAGGTGCT | 101 |
| Mouse | GSc-A      | -1500 to -1000 | TGGAAGGACAGCTAGAGGCC<br>CGTGGGATCTACCGGGACT      | 101 |
| Mouse | GSc-B      | -1000 to -500  | ACAACCTTGTACGAAGGCGGAC<br>CCCTCCGTCTCTTTCCCAA    | 101 |
| Mouse | GSc-C      | -500 to 0      | CCAGGAATAAATCCAGGATGA<br>CGCCTAGCTGAACTCAACCC    | 101 |
| Mouse | GSc-D      | 0 to +500      | TCTCTTTTCGGTTTGCTCGC<br>GGACGCGCCGAAGAAG         | 101 |
| Mouse | Gata6-A    | -1500 to -1000 | AAAGAACCCTTCGCAACG<br>TTGGAGAAAGGAGAGGGATCC      | 101 |
| Mouse | Gata6-B    | -1000 to -500  | ACGCGACAACCAAACCTAGCG<br>TTCGGTTGTGGTGTATGGGA    | 101 |
| Mouse | Gata6-C    | -500 to 0      | CCCCACCCGCTTTTTTTCTC<br>CAGGCTGTGGGTTCGGAAC      | 96  |
| Mouse | Gata6-D    | 0 to +500      | CTCGGTGAGTCCAATCAGGAG<br>GGGTCTGCTAGTCGCTGCTG    | 101 |
| Mouse | FoxA2-A    | -1500 to -1000 | CTTTGCTCCGCGTACCCACT                             | 101 |

|       |         |                |                            |     |
|-------|---------|----------------|----------------------------|-----|
|       |         |                | CTGCTCTTTGATTGTGCTCCC      |     |
| Mouse | FoxA2-B | -1000 to -500  | CACCTGGATTTGGGCCAACTA      | 101 |
|       |         |                | TTCTTGGTTCTGAAAATGTGACTAGG |     |
| Mouse | FoxA2-C | -500 to 0      | CTGCCCTACCCCCACCTACTG      | 101 |
|       |         |                | ATGAGGGCCTCGGTGTTTCA       |     |
| Mouse | FoxA2-D | 0 to +500      | CCCTTCGCAACGAGGTCTCT       | 81  |
|       |         |                | AGGGATCCAAGCAGATTGAAAC     |     |
| Mouse | Mixl1-A | -1500 to -1000 | AGCTGGTGGACAGGTCAAGC       | 101 |
|       |         |                | TGGAAGAGCAGCAAGTGGC        |     |
| Mouse | Mixl1-B | -1000 to -500  | CCTCAAATGAACCCCAGGG        | 109 |
|       |         |                | CAGTGCTCAGAACCCGAGAAG      |     |
| Mouse | Mixl1-C | -500 to 0      | TTGAGAGGTCTTCTGGCCCA       | 99  |
|       |         |                | CAATCCACATACCTCGAACCG      |     |
| Mouse | Mixl1-D | 0 to +500      | AGTTGCTGGAGCTCGTCTTCC      | 102 |
|       |         |                | TCACCTGGATCCTGGACTCG       |     |
| Mouse | Oct4-A  | -1500 to -1000 | CAGACGGCAGATGCATAACAA      | 101 |
|       |         |                | CAGATTAAGGAAGGGCTAGGACG    |     |
| Mouse | Oct4-B  | -1000 to -500  | GCACCTAGAGCCACTGACCC       | 102 |
|       |         |                | CAAAAAGCCCAGAGCACCC        |     |
| Mouse | Oct4-C  | -500 to 0      | GAAAATGAAGGCCTCCTGGG       | 101 |
|       |         |                | AAACTGAGGCGAGCGCTATCT      |     |
| Mouse | Oct4-D  | 0 to +500      | TAGTCCCCCAAGTTGGCGTG       | 101 |
|       |         |                | GTCGGCACAGGGCTCAGAG        |     |
| Mouse | Nanog-A | -1500 to -1000 | GAGAGGACGGCCCTTCCCT        | 101 |
|       |         |                | TGCCGATCAGTCCTTGTGCT       |     |
| Mouse | Nanog-B | -1000 to -500  | GAGGCCAGTCTCGGGTACGT       | 101 |
|       |         |                | GCCTCAGCCGTCTAAGCAATG      |     |
| Mouse | Nanog-C | -500 to 0      | CAATGTCCATGGTGGACCCT       | 101 |
|       |         |                | TACCCACCCCTATTCTCCC        |     |
| Mouse | Nanog-D | 0 to +500      | TCTGGGAACGCCTCATCAAT       | 101 |
|       |         |                | TCCTTACCAGCCTCTGTGCAG      |     |
| Mouse | Sox2-A  | -1500 to -1000 | GGGCTTTGTTTGA CTCCGTGT     | 101 |
|       |         |                | ATCGGCAGGCGCTCAAAA         |     |



|       |        |                |                                                      |     |
|-------|--------|----------------|------------------------------------------------------|-----|
| Mouse | Sox2-B | -1000 to -500  | TGGGAGTTAGAAAGAGCGGGA<br>GCACGTGTCCTCAACCCCTA        | 101 |
| Mouse | Sox2-C | -500 to 0      | GCCAATATTCCGTAGCATGGG<br>CCCCGTTTTTCAGCAACAGGT       | 101 |
| Mouse | Sox2-C | 0 to +500      | GAGAGAAGTTTTGGAGCCCGA<br>CGAAGTGCAATTGGGATGAAA       | 106 |
| Mouse | Klf4-A | -1500 to -1000 | CCTTCCTCAAAGGCTCCCA<br>CCGACCACAGAAGCGCTCTT          | 103 |
| Mouse | Klf4-B | -1000 to -500  | CCTCCCAGTGAAGTCCCTTTG<br>ATAAAGAGGTGAAGCGGCGAG       | 101 |
| Mouse | Klf4-C | -500 to 0      | GCCTTCCTTGTTCCCTTCCATT<br>GGCGCTAGGAATCTCAGAAGC      | 109 |
| Mouse | Klf4-D | 0 to +500      | TCTGCCTTGCTGATTGTCTATTTT<br>TTCAATATAAACCGGCGATGTCTT | 101 |
| Mouse | T-A    | -1500 to -1000 | GCCGAACACCCAGTATTCA<br>CCCTACTTCTGGGAGAGACGG         | 103 |
| Mouse | T-B    | -1000 to -500  | ATGCGTTCCAACAATCCCC<br>GCGTCCCACATAAAAGCTGG          | 101 |
| Mouse | T-C    | -500 to 0      | GTGCAGGGACCCAGGTGTAA<br>TGACTCCCTACCCAACAGCC         | 101 |
| Mouse | T-D    | 0 to +500      | TTTCTTGAAAAGCGGTGGC<br>CCGGCGAGCTCATCCTC             | 101 |
| Mouse | Flk1-A | -1500 to -1000 | TCCAGGCAGGAGAGAGCATT<br>TGACGTTCCAAACTACCCAGG        | 102 |
| Mouse | Flk1-B | -1000 to -500  | CCTACCTCCTGGGTTGGTCA<br>CGCAGCCTTTTCGTACATTCTC       | 103 |
| Mouse | Flk1-C | -500 to 0      | CTGTGATCTGGTCGCTGCC<br>GCTACGCACACAGTCCCCAC          | 102 |
| Mouse | Flk1-D | 0 to +500      | TCCCCAGACAGCATGGTGAG<br>GCGCACGGAGCTAGGATACAT        | 101 |
| Mouse | Cdx2-A | -1500 to -1000 | TATGCGCAGCCGCTCTATC<br>CATTCAATTCACAAGAGCCGC         | 101 |
| Mouse | Cdx2-B | -1000 to -500  | GGAGCTATAATCCGCCACCG                                 | 101 |

|       |        |                |                                 |     |
|-------|--------|----------------|---------------------------------|-----|
|       |        |                | CGAGTCGCTTGAGGTGGGA             |     |
| Mouse | Cdx2-C | -500 to 0      | GTCAGCATGAGGGAGATCGTG           | 101 |
|       |        |                | GGGTCTATGCCGTGCTCATC            |     |
| Mouse | Cdx2-D | 0 to +500      | ACAGTGTTCCGGTCTGGCGC            | 101 |
|       |        |                | CGTATAGTGCCCTTTGGCCC            |     |
| Mouse | Sox7-A | -1500 to -1000 | TTACCTCATCACCGCCTGTG            | 101 |
|       |        |                | TGAGTTACTGAATGCGTGACAGC         |     |
| Mouse | Sox7-B | -1000 to -500  | TCCCACATCCACCTAAGACCC           | 101 |
|       |        |                | ATCGGCCAAGTATGCTGTTGT           |     |
| Mouse | Sox7-C | -500 to 0      | CACAACAGCATACTTGGCCG            | 101 |
|       |        |                | AACTCCCACAAAGGAAAACC            |     |
| Mouse | Sox7-D | 0 to +500      | ATGAGAGGAAACGTCTGGCAG           | 101 |
|       |        |                | CATCCTCGCAACAGCTTCGT            |     |
| Mouse | Sox1-A | -1500 to -1000 | TTGATCATCCCCAGAAGTCC            | 101 |
|       |        |                | CGGAATTGGAAGGTCCAGTG            |     |
| Mouse | Sox1-B | -1000 to -500  | GGAGCGTAGCACCACACAAA            | 101 |
|       |        |                | GGTGCATTCTCAGAGCCTGC            |     |
| Mouse | Sox1-C | -500 to 0      | CCTCCTCCTGCCCTTGTTT             | 101 |
|       |        |                | CGCTGGCGAGTGACG TG              |     |
| Mouse | Sox1-D | 0 to +500      | CCTTGCTAGAAGTTGCGGTCC           | 101 |
|       |        |                | CGACGCAGGGTTTCGCTG              |     |
| Mouse | Tuj1-A | -1500 to -1000 | GCATTTGGTTTTTGGCAGGAG           | 102 |
|       |        |                | CAGCCTTCACCCCTCGTTTT            |     |
| Mouse | Tuj1-B | -1000 to -500  | TCTTCTCTGTGCATTTGCCCT           | 101 |
|       |        |                | TCGGTTGTGAACTCCTGCCT            |     |
| Mouse | Tuj1-C | -500 to 0      | AGAAACCGAGCTGCGTCCA             | 101 |
|       |        |                | TTTGGGTTTTCCCGGTTTCC            |     |
| Mouse | Tuj1-D | 0 to +500      | GGCGCTCTCTTTCTGCCCT             | 102 |
|       |        |                | CAGTCTGGGCTTTTCAGTCTTG          |     |
| Mouse | 3C-1   | -7500 to -7000 | CTCACGGGTCTAAGCAAGCATGATGGCTCAT |     |
| Mouse | 3C-2   | -7000 to -6500 | CTTAAGGCCCATTTCTTGAA            |     |
| Mouse | 3C-3   | -6000 to -5500 | TCTCTCTCTCTTCCCTTGTTTATCTGA     |     |
| Mouse | 3C-4   | -1000 to -1500 | GTGTGATCGCATTGGGTTGGG           |     |

|       |                             |                |                                                |     |
|-------|-----------------------------|----------------|------------------------------------------------|-----|
| Mouse | 3C-5                        | -1000 to -500  | AAAACCGAGCAGAGGGAATTCT                         |     |
| Mouse | 3C-6                        | -1000 to -500  | GAGGGAATTCTGAGTAATGAAAGTG                      |     |
| Mouse | 3C-7                        | -500 to 0      | TCTCCAGCCCTCCCCTAGAT                           |     |
| Mouse | 3C-8                        | -500 to 0      | AGACCATGTTTCGCAGACTTCAA                        |     |
| Mouse | 3C-9                        | 0 to +500      | GTCCTCTTCTTCCTTAGTGTGAG                        |     |
| Mouse | 3C-10                       | 0 to +500      | GAAGGAAGGAGAGAGACACCTACAA                      |     |
| Mouse | 3C-11                       | 0 to +500      | TCCCCCAACTGGCCTTTATAA                          |     |
| Mouse | 3C-12                       | +1000 to +1500 | CCCACGTTACTCTCCTCTCTAGTCA                      |     |
| Mouse | 3C-13                       | +1500 to +2000 | CAAAGAGGGCTCGTTGAGAGA                          |     |
| Mouse | 3C-14                       | +2000 to +2500 | GCCATTTTTGTTTGTGTTGCTGTT                       |     |
| Mouse | 3C FAM-<br>TAMRA<br>(Probe) | -7500 to -7000 | TCCCTGGTGGTCACTGACTGCATTTTATA                  |     |
| Human | EOMES<br>-Enhancer          | -7000          | GGCCTTGGGAAAAACAGAAT<br>GGAGAGGTGCACTTCAAAGC   | 101 |
| Human | EOMES-A                     | -1500 to -1000 | CCAAAAGCTTAGCGCGAGTT<br>AACTCCCTGGCCTTCAACG    | 101 |
| Human | EOMES-B                     | -1000 to -500  | CAAGCTGATAGCTTGCAGGGA<br>ACAGCTTCCGACCAGGAAAG  | 101 |
| Human | EOMES-C                     | -500 to 0      | AACTTGACCGATGCTTTGGC<br>GGCTCACACGCTGGAAGAAG   | 101 |
| Human | EOMES-D                     | 0 to +500      | GGCCCCCTCTCCTCAGAAG<br>GGAGAGACTGCCGAAAACTT    | 101 |
| Human | Negative                    | Chr13          | CTCCCAAATTGCTGGGATTA<br>ATTCCAGGCACCACAAAAAG   | 156 |
| Human | SOX17-A                     | -1500 to -1000 | ACTTGTCCCCTAGCCAAGGC<br>TCTGGCATTGCTTTTTCTCAA  | 101 |
| Human | SOX17-B                     | -1000 to -500  | AGAGCTGCAAGTCTGAAGGCG<br>GAAAGGAAACGGAGGCAGAGA | 101 |
| Human | SOX17-C                     | -500 to 0      | TGAAACACCCTCGGCTTCTG<br>TGGAATCGACGTACTTGCCC   | 101 |
| Human | SOX17-D                     | 0 to +500      | AAGATGCTGGGTGAGTCCGA<br>CAGGCTCGCAAAGAACAGTTT  | 102 |
| Human | SOX7-A                      | -1500 to -1000 | TTCACCTTACACTTGCCGGG                           | 101 |

|       |        |                |                             |     |
|-------|--------|----------------|-----------------------------|-----|
|       |        |                | AGCCTGAGTCCGGATTTCAAT       |     |
| Human | SOX7-B | -1000 to -500  | TGGGTGGCGCTCAGTAAATT        | 101 |
|       |        |                | GCCTGCAGAATGAGTGAGCA        |     |
| Human | SOX7-C | -500 to 0      | GGCGGCCCAAGTTGACTG          | 101 |
|       |        |                | CCATGAACCCCTCAGAGCAG        |     |
| Human | SOX7-D | 0 to +500      | GCGGTGCCCAGGATTCAG          | 101 |
|       |        |                | GCCGATCTCCGCTCCTGTC         |     |
| Human | T-A    | -1500 to -1000 | CTGGGAACCGAGGAACAAAG        | 102 |
|       |        |                | TTGGCCAGCACTTGTGTAGTG       |     |
| Human | T-B    | -1000 to -500  | TAACACGCACCACGCTCTCC        | 102 |
|       |        |                | GGCACCAAAAGGACCTCATTT       |     |
| Human | T-C    | -500 to 0      | GCGTCAGGAGCAAATGAGGT        | 101 |
|       |        |                | TTGATGTCTGGGATGCATGG        |     |
| Human | T-D    | 0 to +500      | TGACCTCGGCAACAAGTCTT        | 101 |
|       |        |                | GCAGAGAGGGAAATGGACGG        |     |
| Human | 3C-1   | -7500 to -7000 | GATGACCGATTCTACCGCAAA       |     |
| Human | 3C-2   | -7000 to -6500 | GATACGCCTTTACTATGGCTCCTT    |     |
| Human | 3C-3   | -6500 to -6000 | AGGTGGAGAACAAAAGCTGAGCTA    |     |
| Human | 3C-4   | -6500 to -6000 | GAAGGCACAGCCTGGTTAGG        |     |
| Human | 3C-5   | -6500 to -6000 | CCTGGTTCACGTTGCTTTTGA       |     |
| Human | 3C-6   | -4500 to -4000 | CAACTCACCACAAAAAACCCATT     |     |
| Human | 3C-7   | -2000 to -1500 | CGAAGAGTTTCCCGTGTGATC       |     |
| Human | 3C-8   | -1500 to -1000 | GGAAGCTTTGTTTCTTGGTGTCA     |     |
| Human | 3C-9   | -1500 to -1000 | TTCTGATTTAGAAGCTGAGAGCTTAGG |     |
| Human | 3C-10  | -1000 to -500  | GCTTCCGACGAGGAAAGAGA        |     |
| Human | 3C-11  | -1000 to -500  | GCGACTTGATCCAATTAGTAAATGC   |     |
| Human | 3C-12  | -500 to 0      | GGAGAGGGCTTCTGGGTTAGTT      |     |
| Human | 3C-13  | -500 to 0      | TCCCCCATCCTGCCTTTATAAT      |     |
| Human | 3C-14  | 0 to +500      | GCCCCCTCTCCTCAGAAGTT        |     |
| Human | 3C-15  | 0 to +500      | GCGGCCATGCTTAGTGACA         |     |
| Human | 3C-16  | 0 to +500      | GGCCACTGCGCGCTACT           |     |
| Human | 3C-17  | +500 to +1000  | CTGCTCACTCTTCCCGTACCA       |     |
| Human | 3C-18  | +1000 to +1500 | CCACAAGCTGGATTCGTTAGATC     |     |

|          |                |                           |                                                |     |
|----------|----------------|---------------------------|------------------------------------------------|-----|
| Human    | 3C-19          | +1000 to +1500            | TAGATGGGCTCCCGCAGTT                            |     |
| Human    | 3C FAM-<br>VIC | -7500 to -7000<br>(Probe) | TTGGGATTTGCAACCGAGTCATGGA                      |     |
| Promoter | mCherry_F      |                           | ACTCACACTGCTGGCGGGT                            | 125 |
| -mCherry | mCherry_R      |                           | GCGCATGAACTCCTTGATGAT                          |     |
| Mouse    | Cyclophilin    | cDNA                      | GTCTCCTTCGAGCTGTTTGC<br>AGCCAAATCCTTTCTCTCCA   | 85  |
| Mouse    | Sox17          | cDNA                      | CACAACGCAGAGCTAAGCAA<br>CGCTTCTCTGCCAAGGTC     | 65  |
| Mouse    | Eomes          | cDNA                      | ACCGGCACCAAAGTGA<br>AAGCTCAAGAAAGGAAACATGC     | 64  |
| Mouse    | GSc            | cDNA                      | GAGACGAAGTACCCAGACGTG<br>GCGGTTCTTAAACCAGACCTC | 93  |
| Mouse    | Gata6          | cDNA                      | GGTCTCTACAGCAAGATGAATGG<br>TGGCACAGGACAGTCCAAG | 94  |
| Mouse    | Foxa2          | cDNA                      | GAGCAGCAACATCACCACAG<br>CGTAGGCCTTGAGGTCCAT    | 64  |
| Mouse    | Mix11          | cDNA                      | CCATGTACCCAGACATCCACT<br>CGGTTCTGGAACACACCT    | 88  |
| Mouse    | Jmjd3          | cDNA                      | GTACAGACCCCCGGAACC<br>TGGTGGAGAAAAGGCCTAAG     | 81  |
| Mouse    | Smad4          | cDNA                      | CCGTGGGTGGAATAGCTC<br>GGTCATCCACACCGATGC       | 63  |
| Mouse    | Oct4           | cDNA                      | GTTGGAGAAGGTGGAACCAA<br>CTCCTTCTGCAGGGCTTTC    | 61  |
| Mouse    | Tbx3           | cDNA                      | TTGCAAAGGGTTTTTCGAGAC<br>TGCAGTGTGAGCTGCTTTCT  | 64  |
| Mouse    | Nanog          | cDNA                      | TTCTTGCTTACAAGGGTCTGC<br>AGAGGAAGGGCGAGGAGA    | 67  |
| Human    | Cyclophilin    | cDNA                      | TGCTGTCTTTGGGACCTTGTC<br>ACCCACCGTGTCTTCGAC    | 91  |
| Human    | SOX17          | cDNA                      | ACGCCGAGTTGAGCAAGA<br>TCTGCCTCCTCCACGAAG       | 82  |

**Supplementary Table 3. Antibodies used in this study**

| Protein recognized | Raised in (isotype) | Company/Origin       |
|--------------------|---------------------|----------------------|
| H3K4me1            | Rabbit (IgG)        | Abcam                |
| H3K4me3            | Rabbit (IgG)        | Millipore            |
| H3K27me3           | Rabbit (IgG)        | Millipore            |
| H3K27Ac            | Rabbit (IgG)        | Abcam                |
| H2A.Ub             | Mouse (IgM)         | Millipore            |
| H3                 | Rabbit (IgG)        | Cell Signaling       |
| Pol2 (8WG16)       | Rabbit (IgG)        | Abcam                |
| CTD-Pol2-Ser5P     | Rabbit (IgG)        | Abcam                |
| CTD-Pol2-Ser2P     | Mouse (IgM)         | Covance              |
| Med12              | Rabbit (IgG)        | Bethyl Laboratories  |
| Cdk9               | Rabbit (IgG)        | Santa Cruz           |
| Ezh2               | Mouse (IgG)         | Millipore            |
| Ring1              | Rabbit (IgG)        | Santa Cruz           |
| Jmjd3              | Rabbit (IgG)        | Millipore            |
| Set7/9             | Rabbit (IgG)        | Bethyl Laboratories  |
| Smad2              | Rabbit (IgG)        | Cell Signaling       |
| Smad2/3            | Rabbit (IgG)        | BD Biosciences       |
| Nanog              | Rabbit (IgG)        | Bethyl Laboratories  |
| Tbx3               | Goat (IgG)          | Santa Cruz           |
| Oct4               | Goat (IgG)          | Santa Cruz           |
| Sox2               | Goat (IgG)          | Santa Cruz           |
| Eomes              | Rabbit (IgG)        | Abcam                |
| Mouse IgM          | Rabbit (IgG)        | Millipore            |
| Mouse IgG          | Rabbit (IgG)-HRP    | Jackson Laboratories |
| Rabbit IgG         | Donkey (IgG)-HRP    | Jackson Laboratories |
| Goat IgG           | Donkey (IgG)-HRP    | Jackson Laboratories |

## Supplementary References

Battke, F., Symons, S., and Nieselt, K. (2010). Mayday--integrative analytics for expression data. *BMC Bioinformatics* *11*, 121.

Conlon, F. L., Fairclough, L., Price, B. M., Casey, E. S., and Smith, J. C. (2001). Determinants of T box protein specificity. *Development* *128*, 3749-3758.

Deckers, M., van Dinther, M., Buijs, J., Que, I., Lowik, C., van der Pluijm, G., and ten Dijke, P. (2006). The tumor suppressor Smad4 is required for transforming growth factor beta-induced epithelial to mesenchymal transition and bone metastasis of breast cancer cells. *Cancer Res* *66*, 2202-2209.

Gavrilov, A., Eivazova, E., Priozhkova, I., Lipinski, M., Razin, S., and Vassetzky, Y. (2009). Chromosome conformation capture (from 3C to 5C) and its ChIP-based modification. *Methods Mol Biol* *567*, 171-188.

Han, J., Yuan, P., Yang, H., Zhang, J., Soh, B. S., Li, P., Lim, S. L., Cao, S., Tay, J., Orlov, Y. L., *et al.* (2010). Tbx3 improves the germ-line competency of induced pluripotent stem cells. *Nature* *463*, 1096-1100.
